# Supplementary material
Source: PubMed Central journal article supplement (PMC8238917)

Figure S1. Cho, Xi et al.

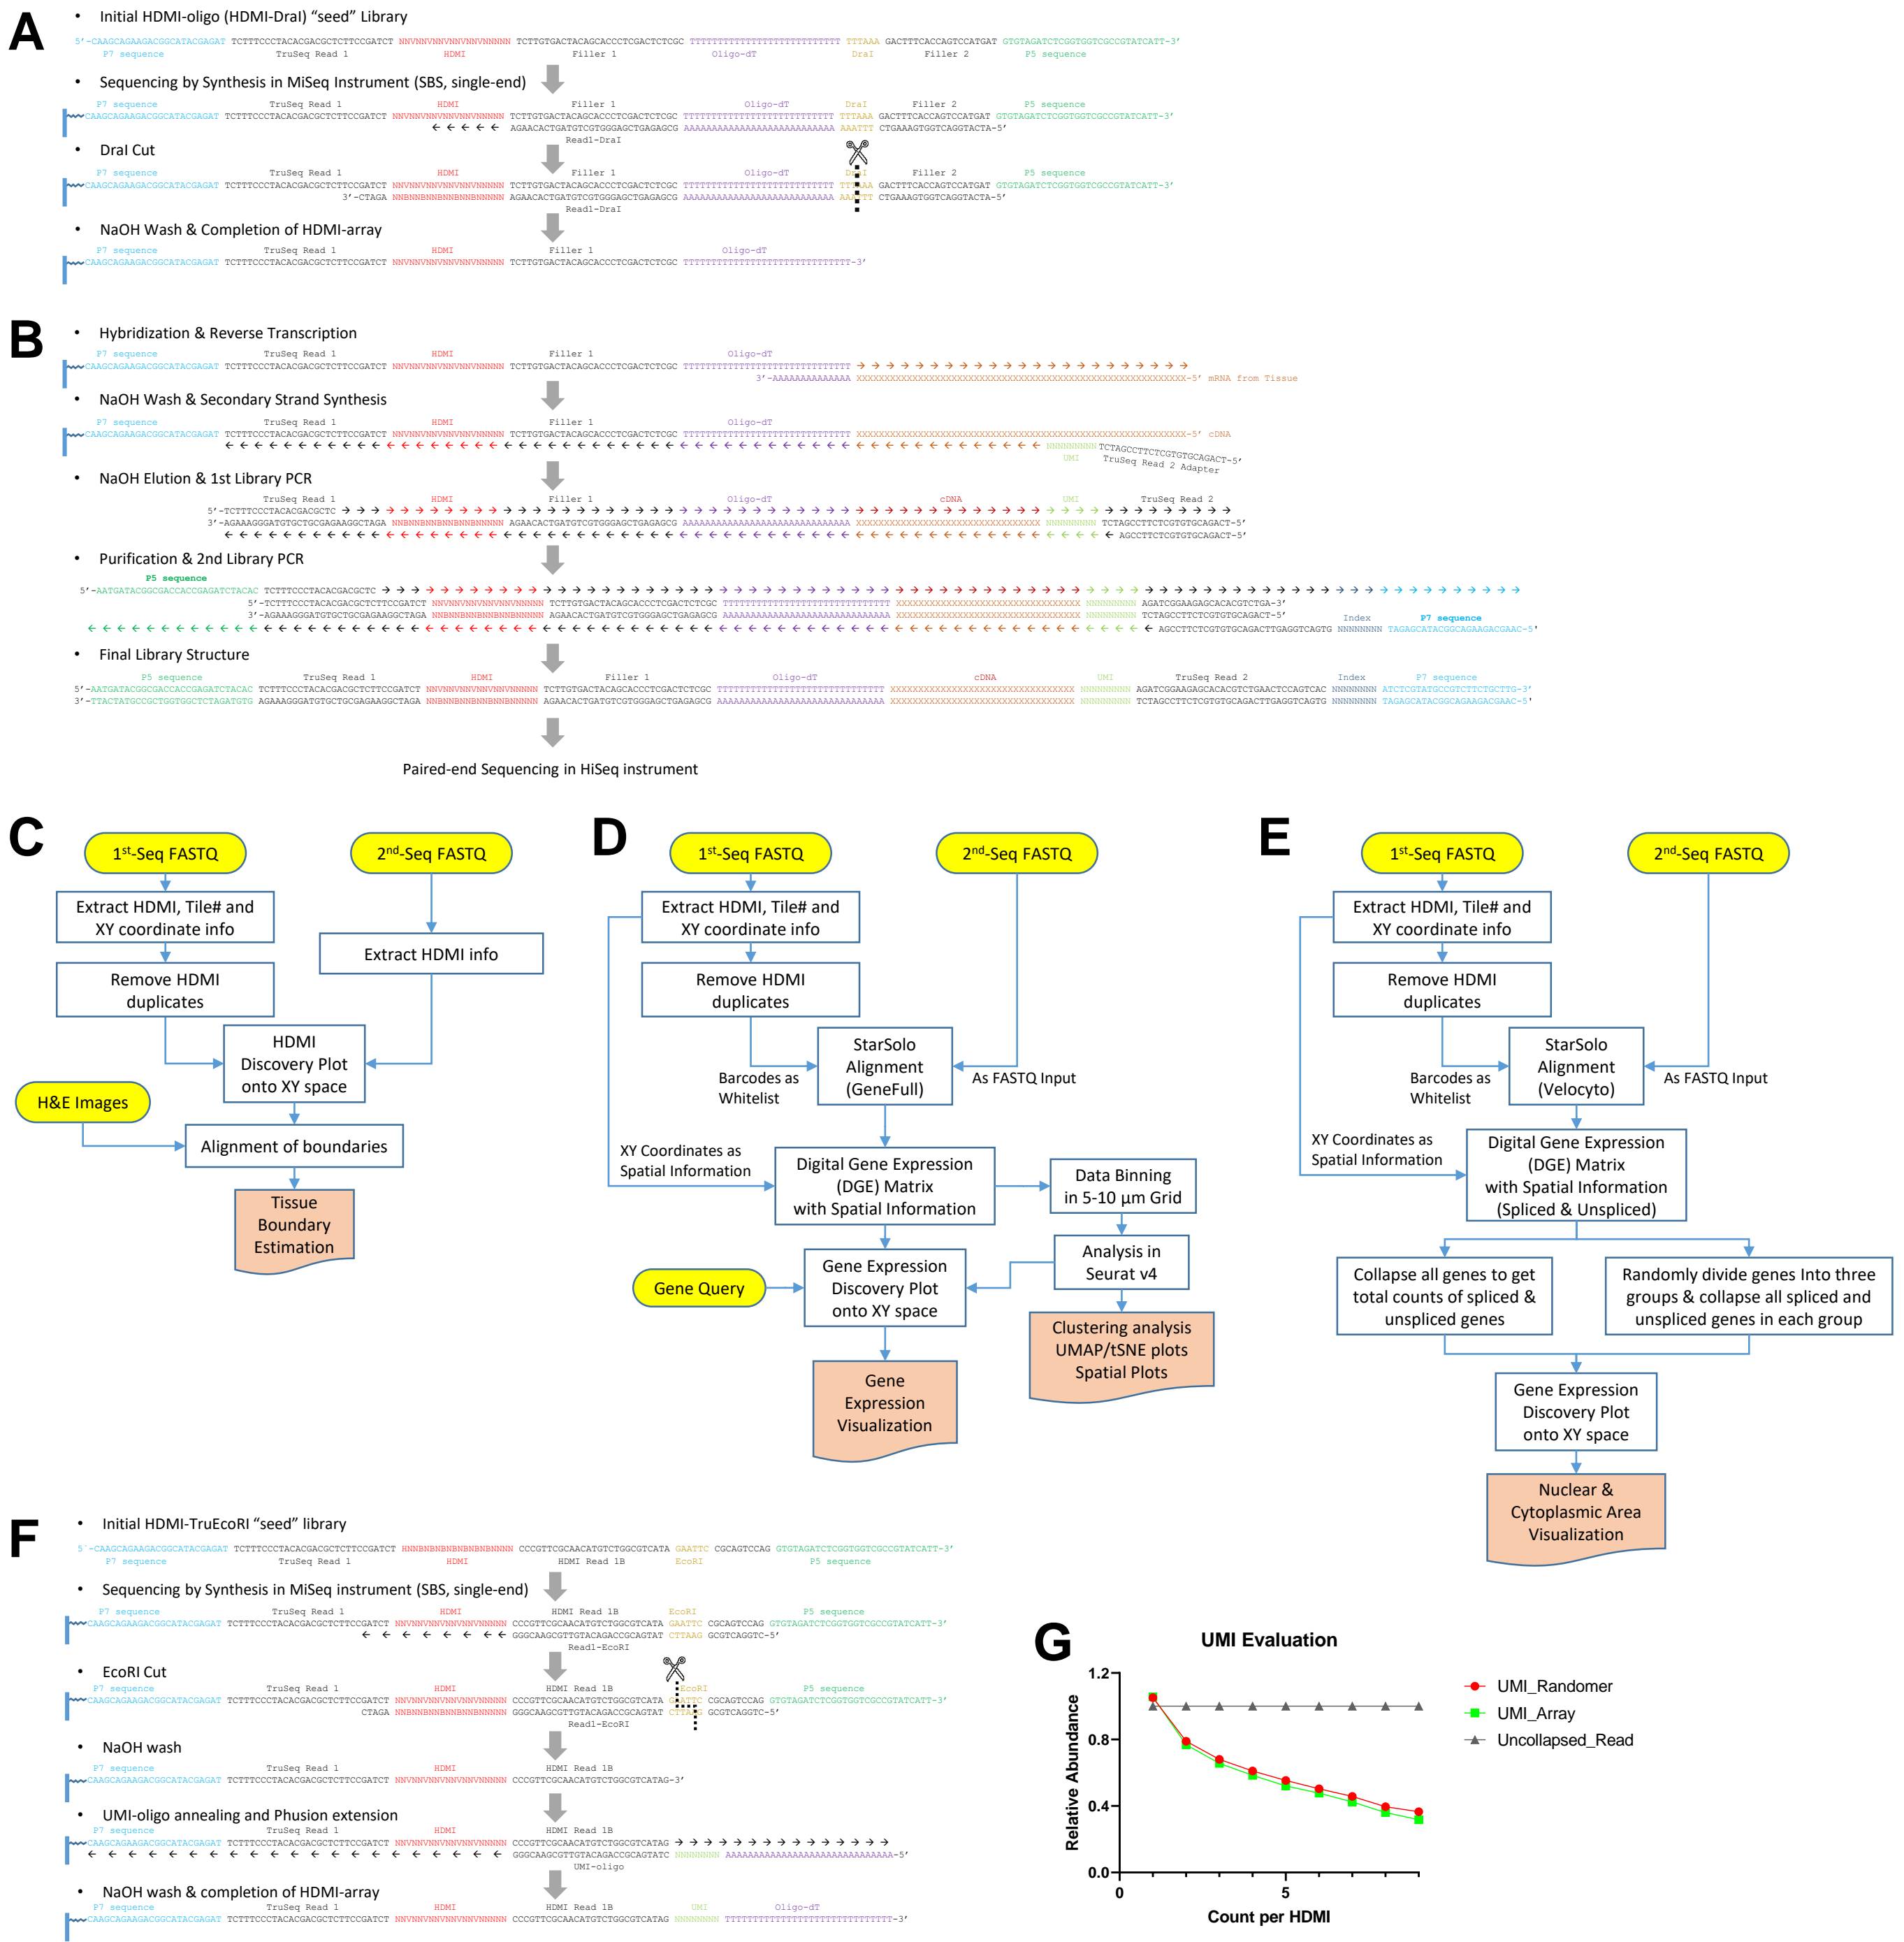

Supplement: NIHMS1704034-supplement-1.pdf [file NIHMS1704034-supplement-1.pdf]

Figure S2. Cho, Xi et al.

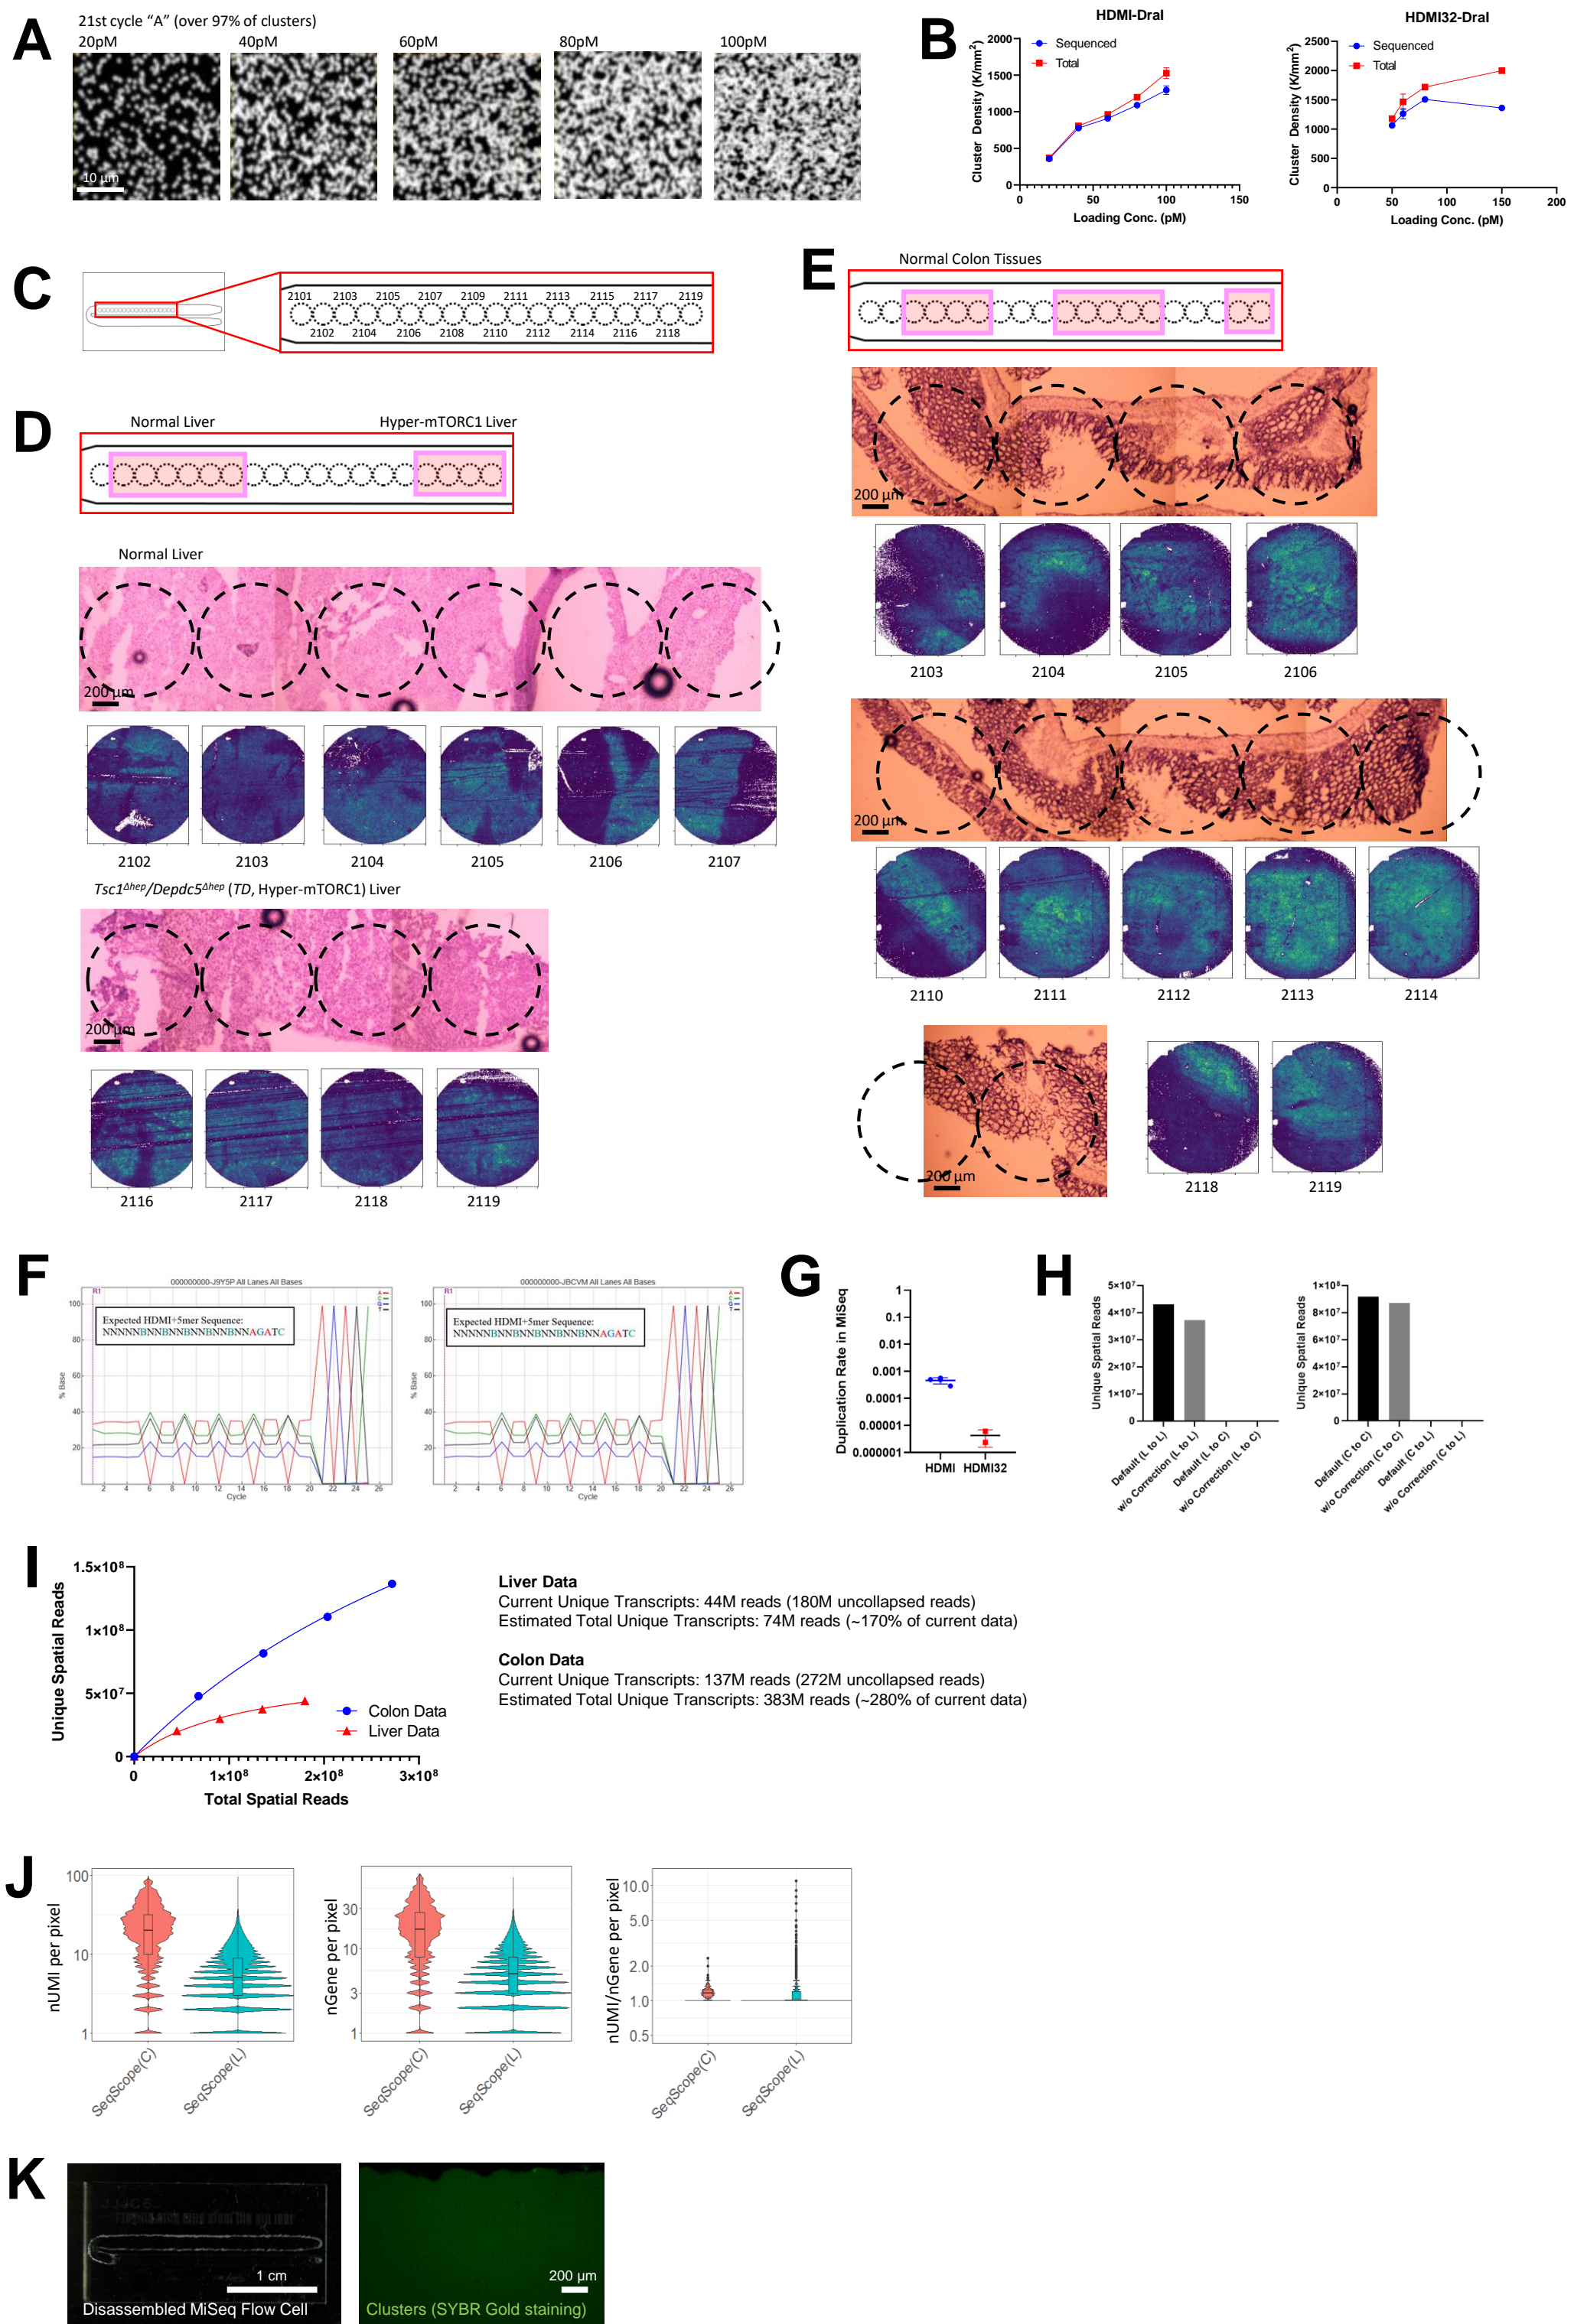

Supplement: NIHMS1704034-supplement-2.pdf [file NIHMS1704034-supplement-2.pdf]

Figure S3. Cho, Xi et al.

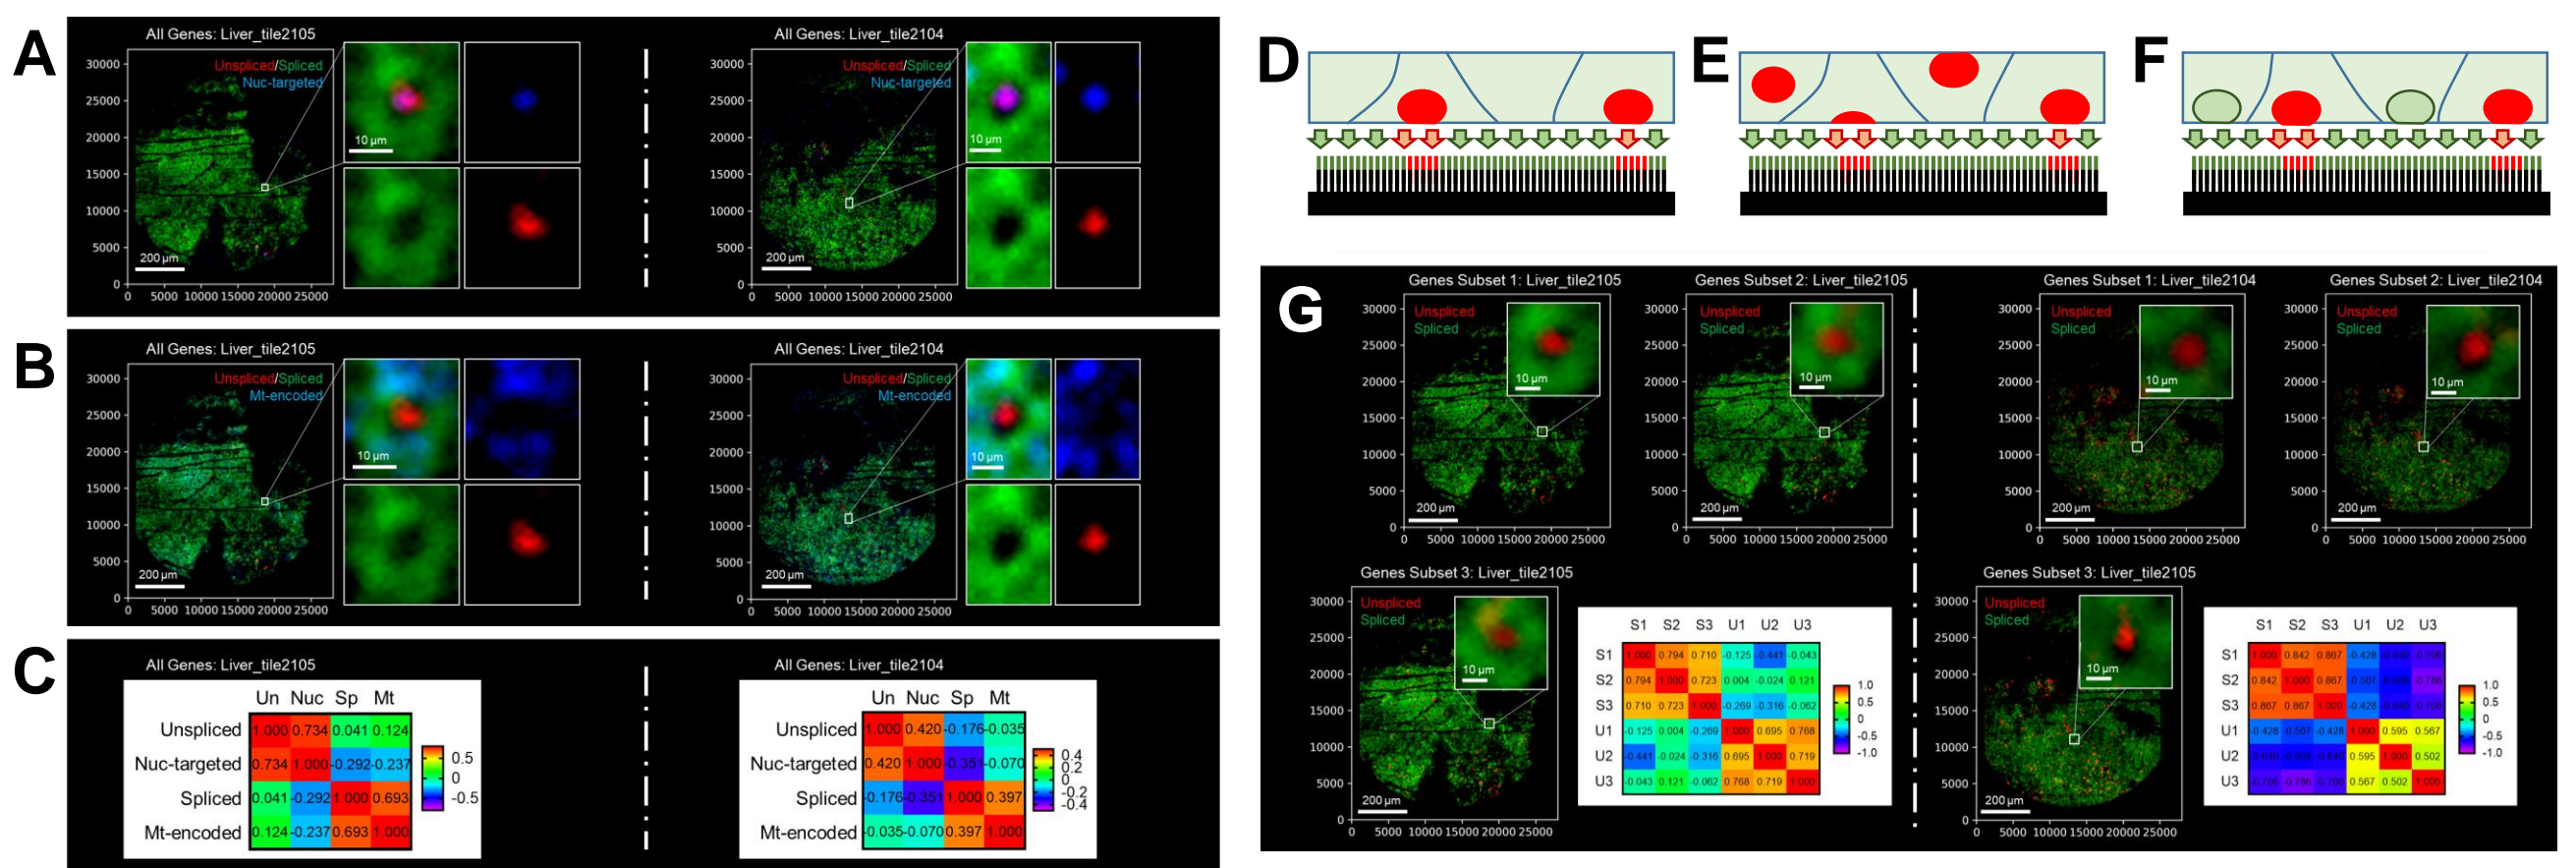

Supplement: NIHMS1704034-supplement-3.pdf [file NIHMS1704034-supplement-3.pdf]

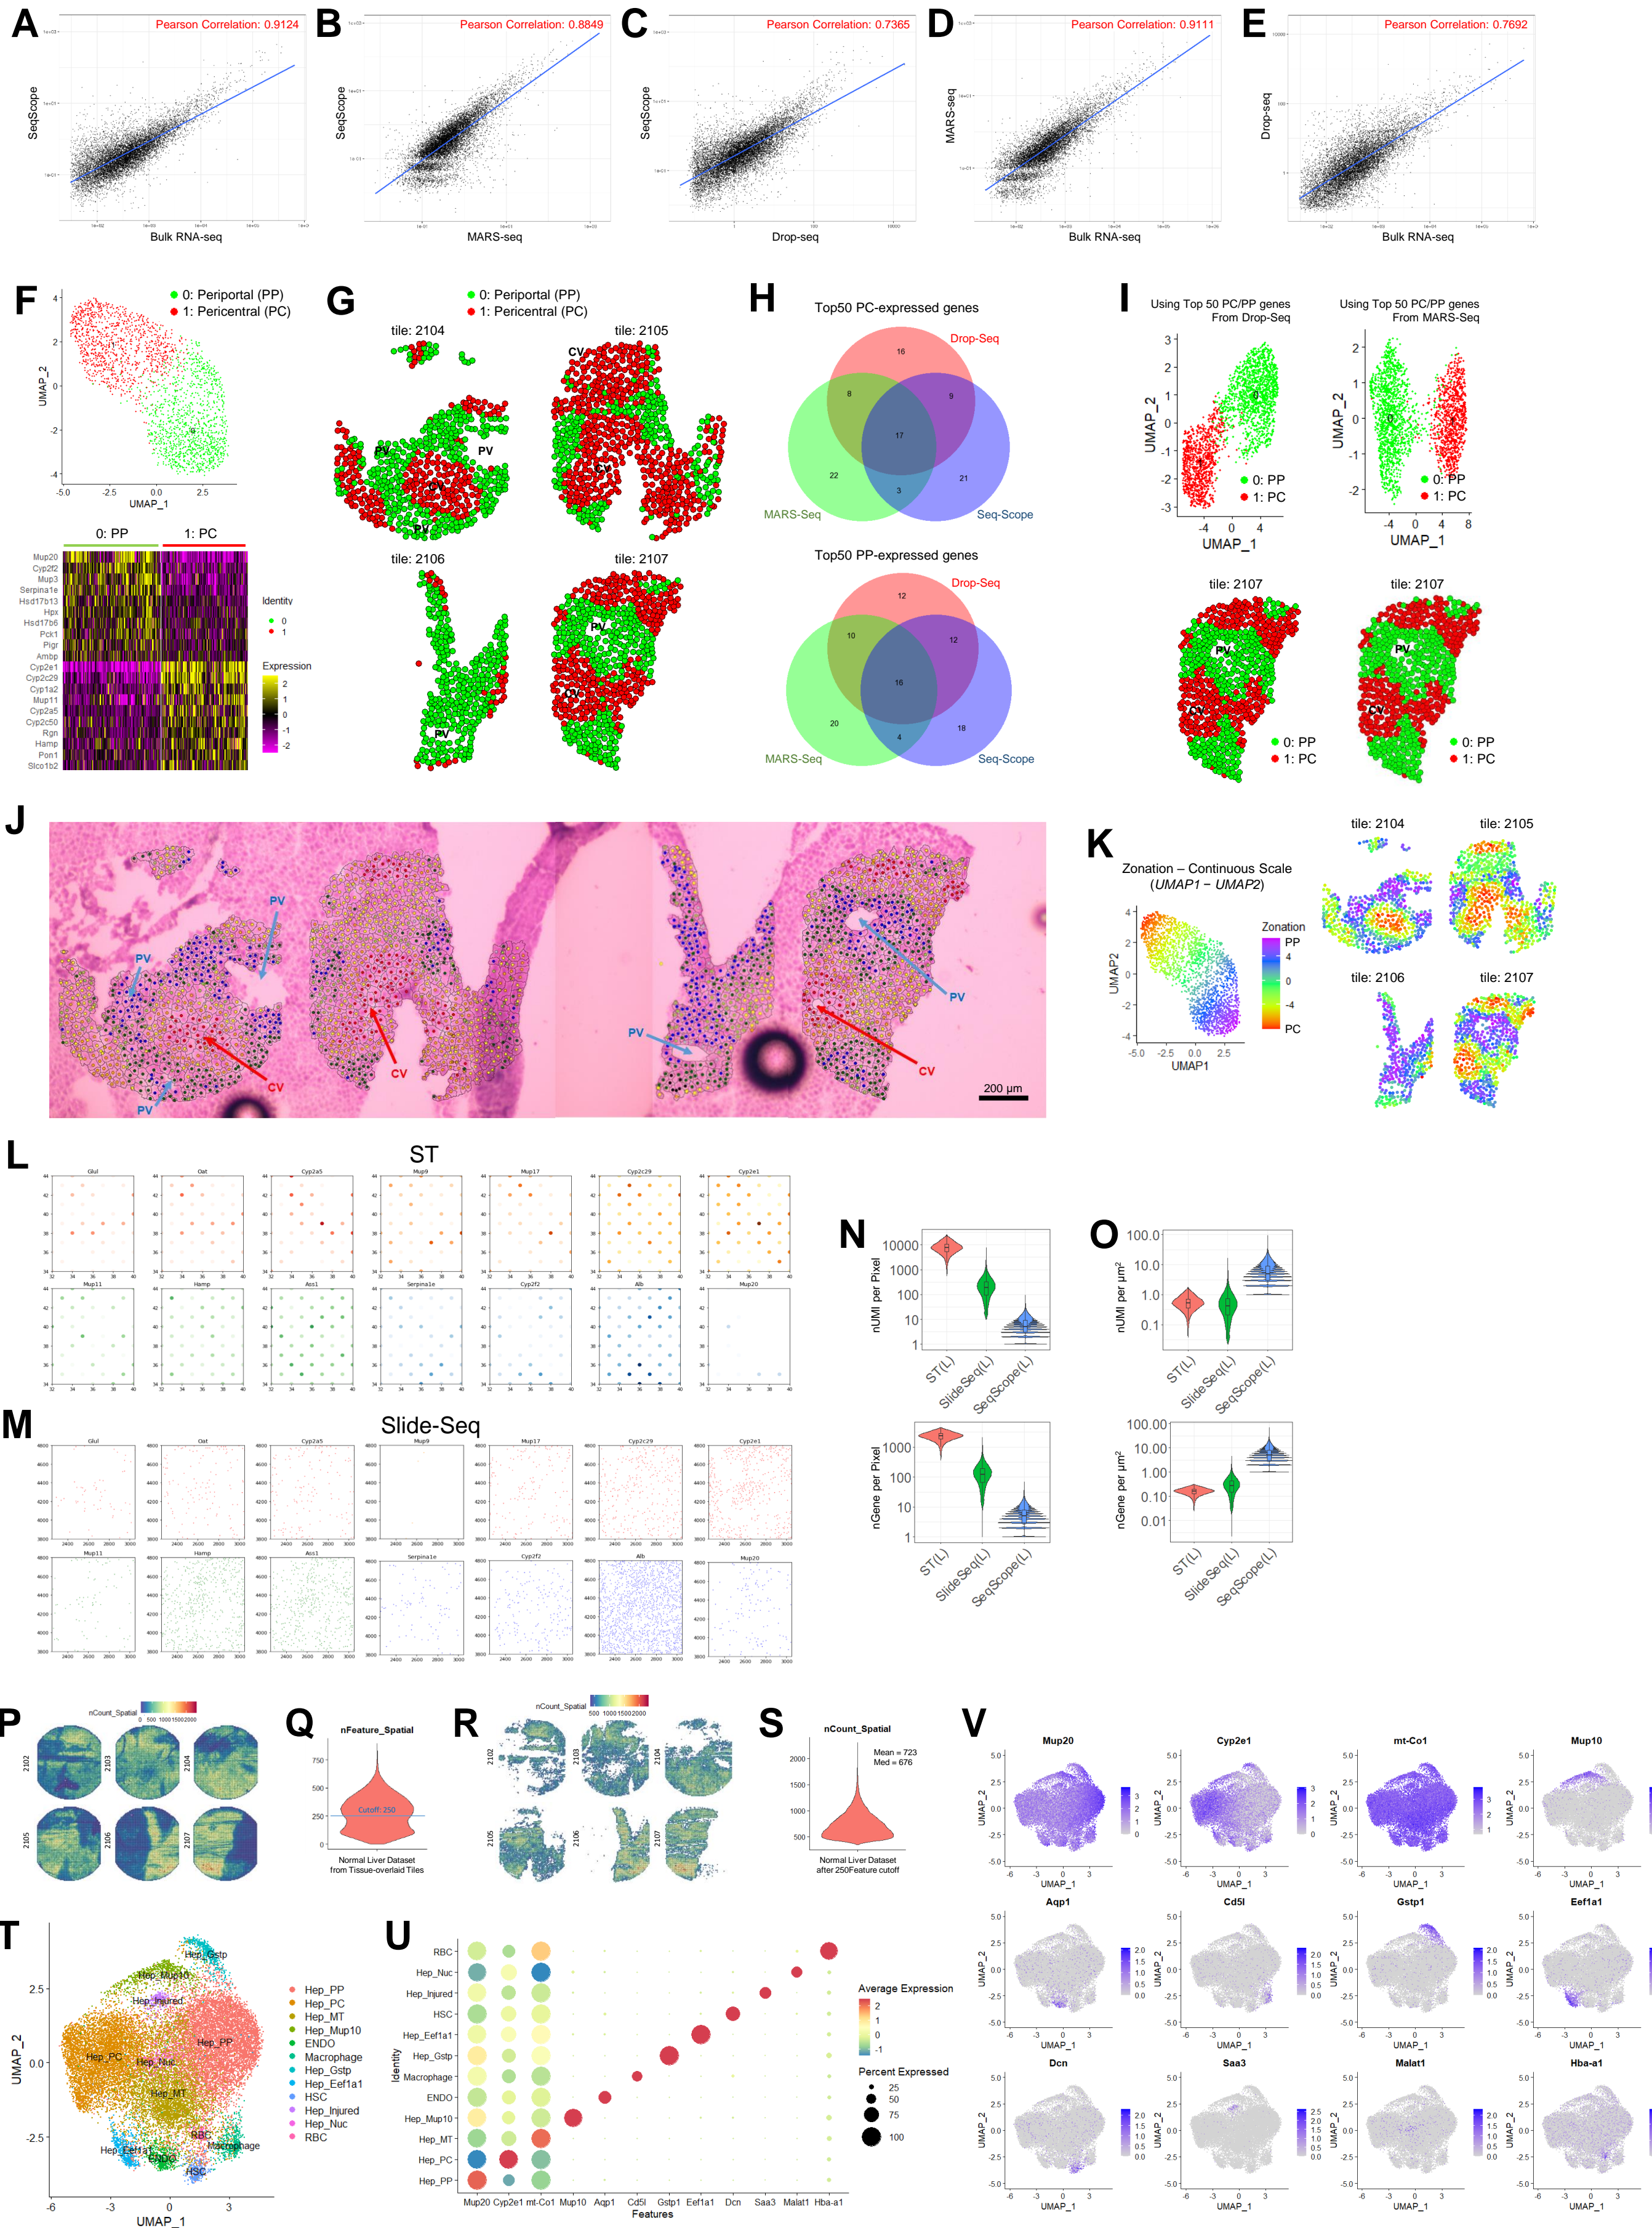

Supplement: NIHMS1704034-supplement-4.pdf [file NIHMS1704034-supplement-4.pdf]

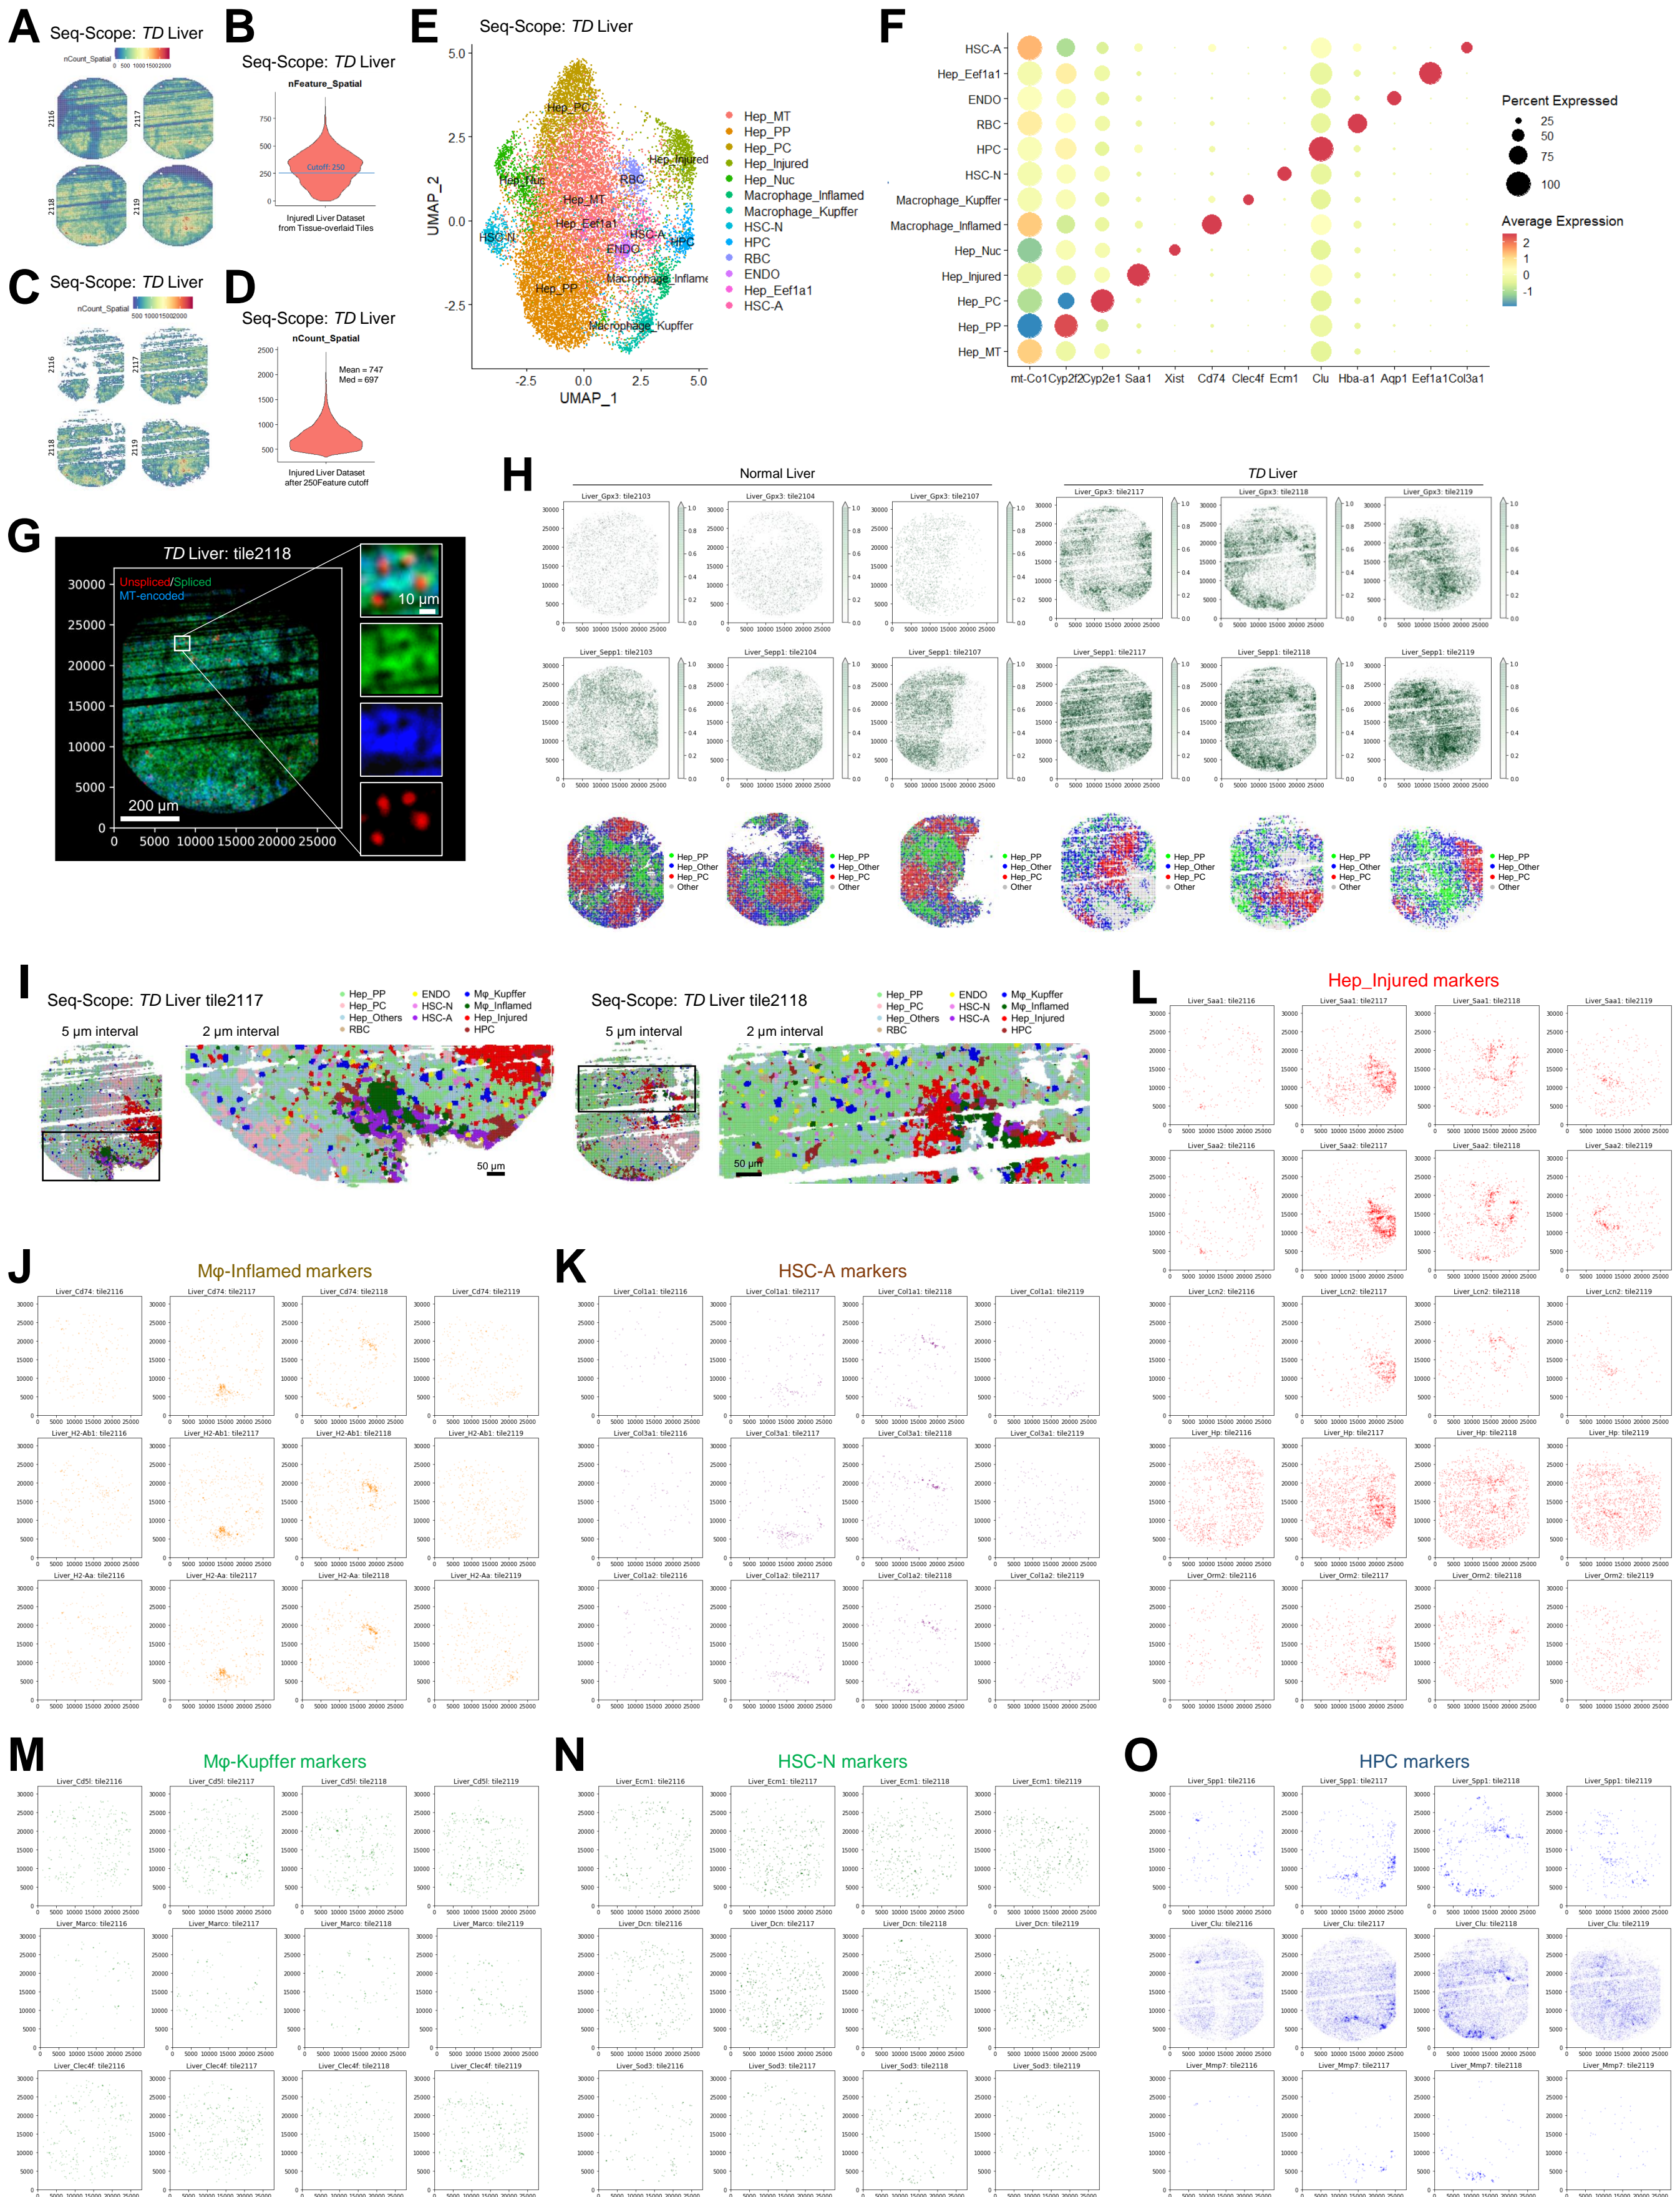

Supplement: NIHMS1704034-supplement-5.pdf [file NIHMS1704034-supplement-5.pdf]

Figure S6. Cho, Xi et al.

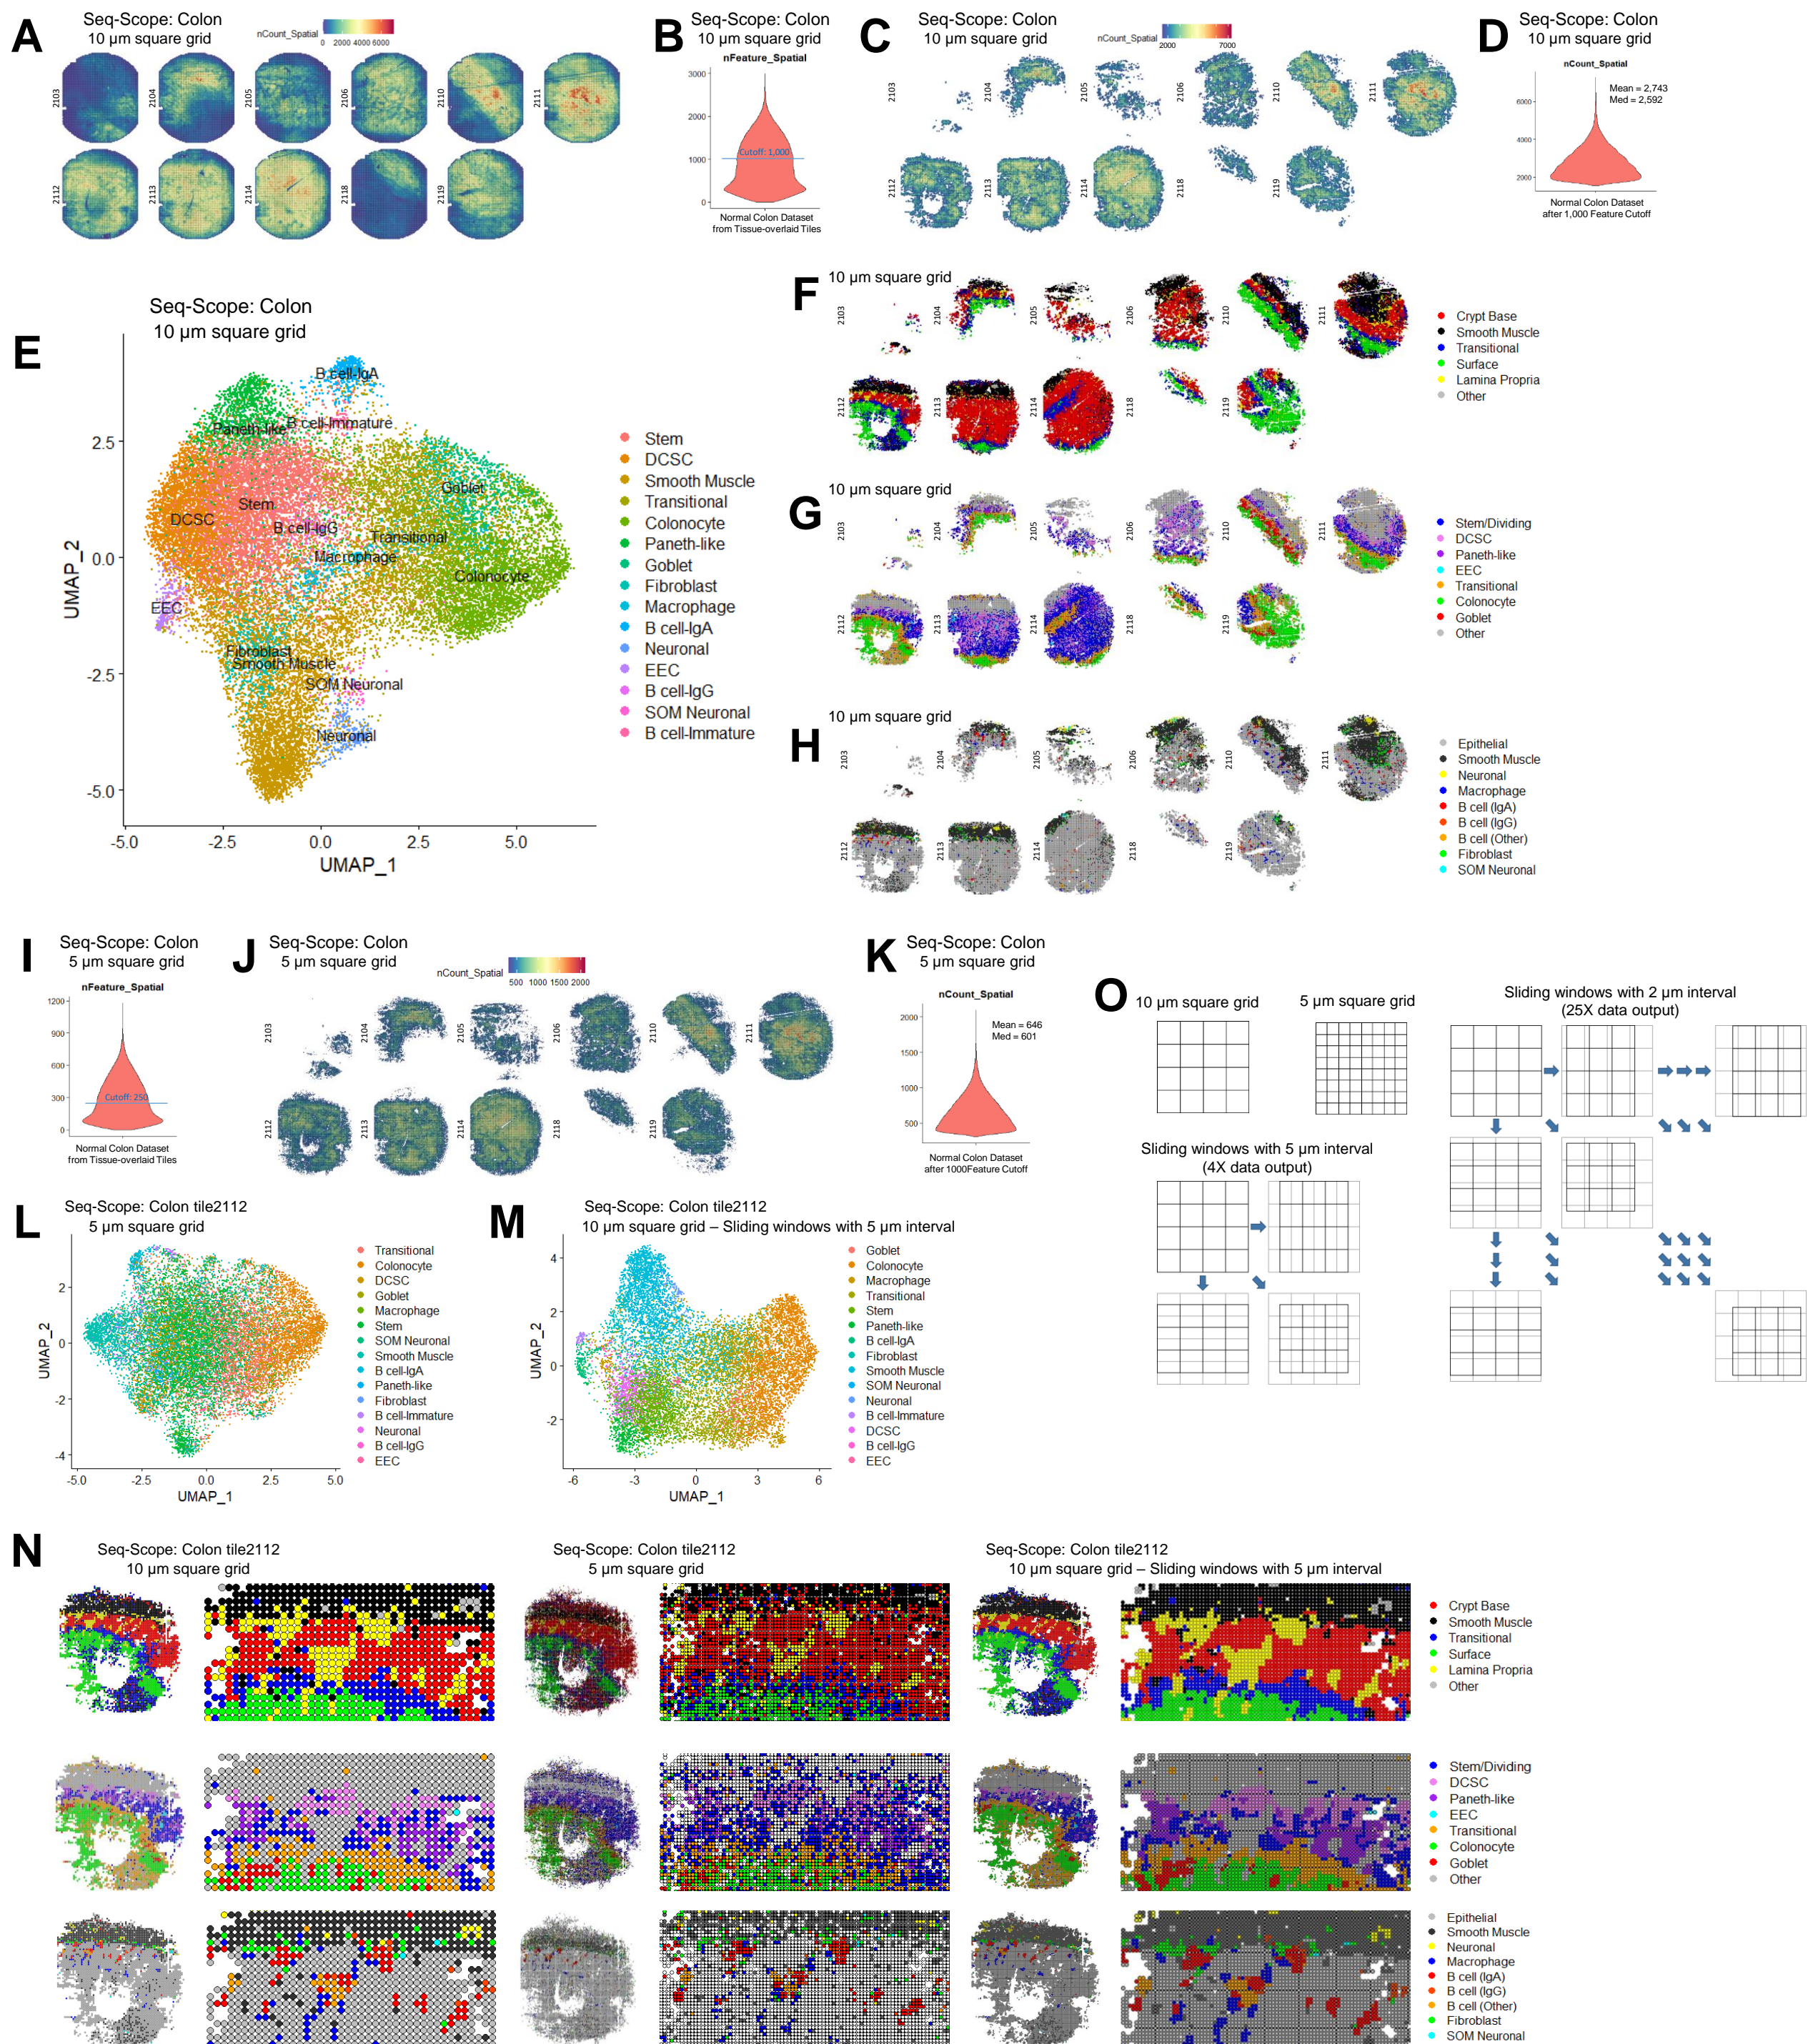

Supplement: NIHMS1704034-supplement-6.pdf [file NIHMS1704034-supplement-6.pdf]

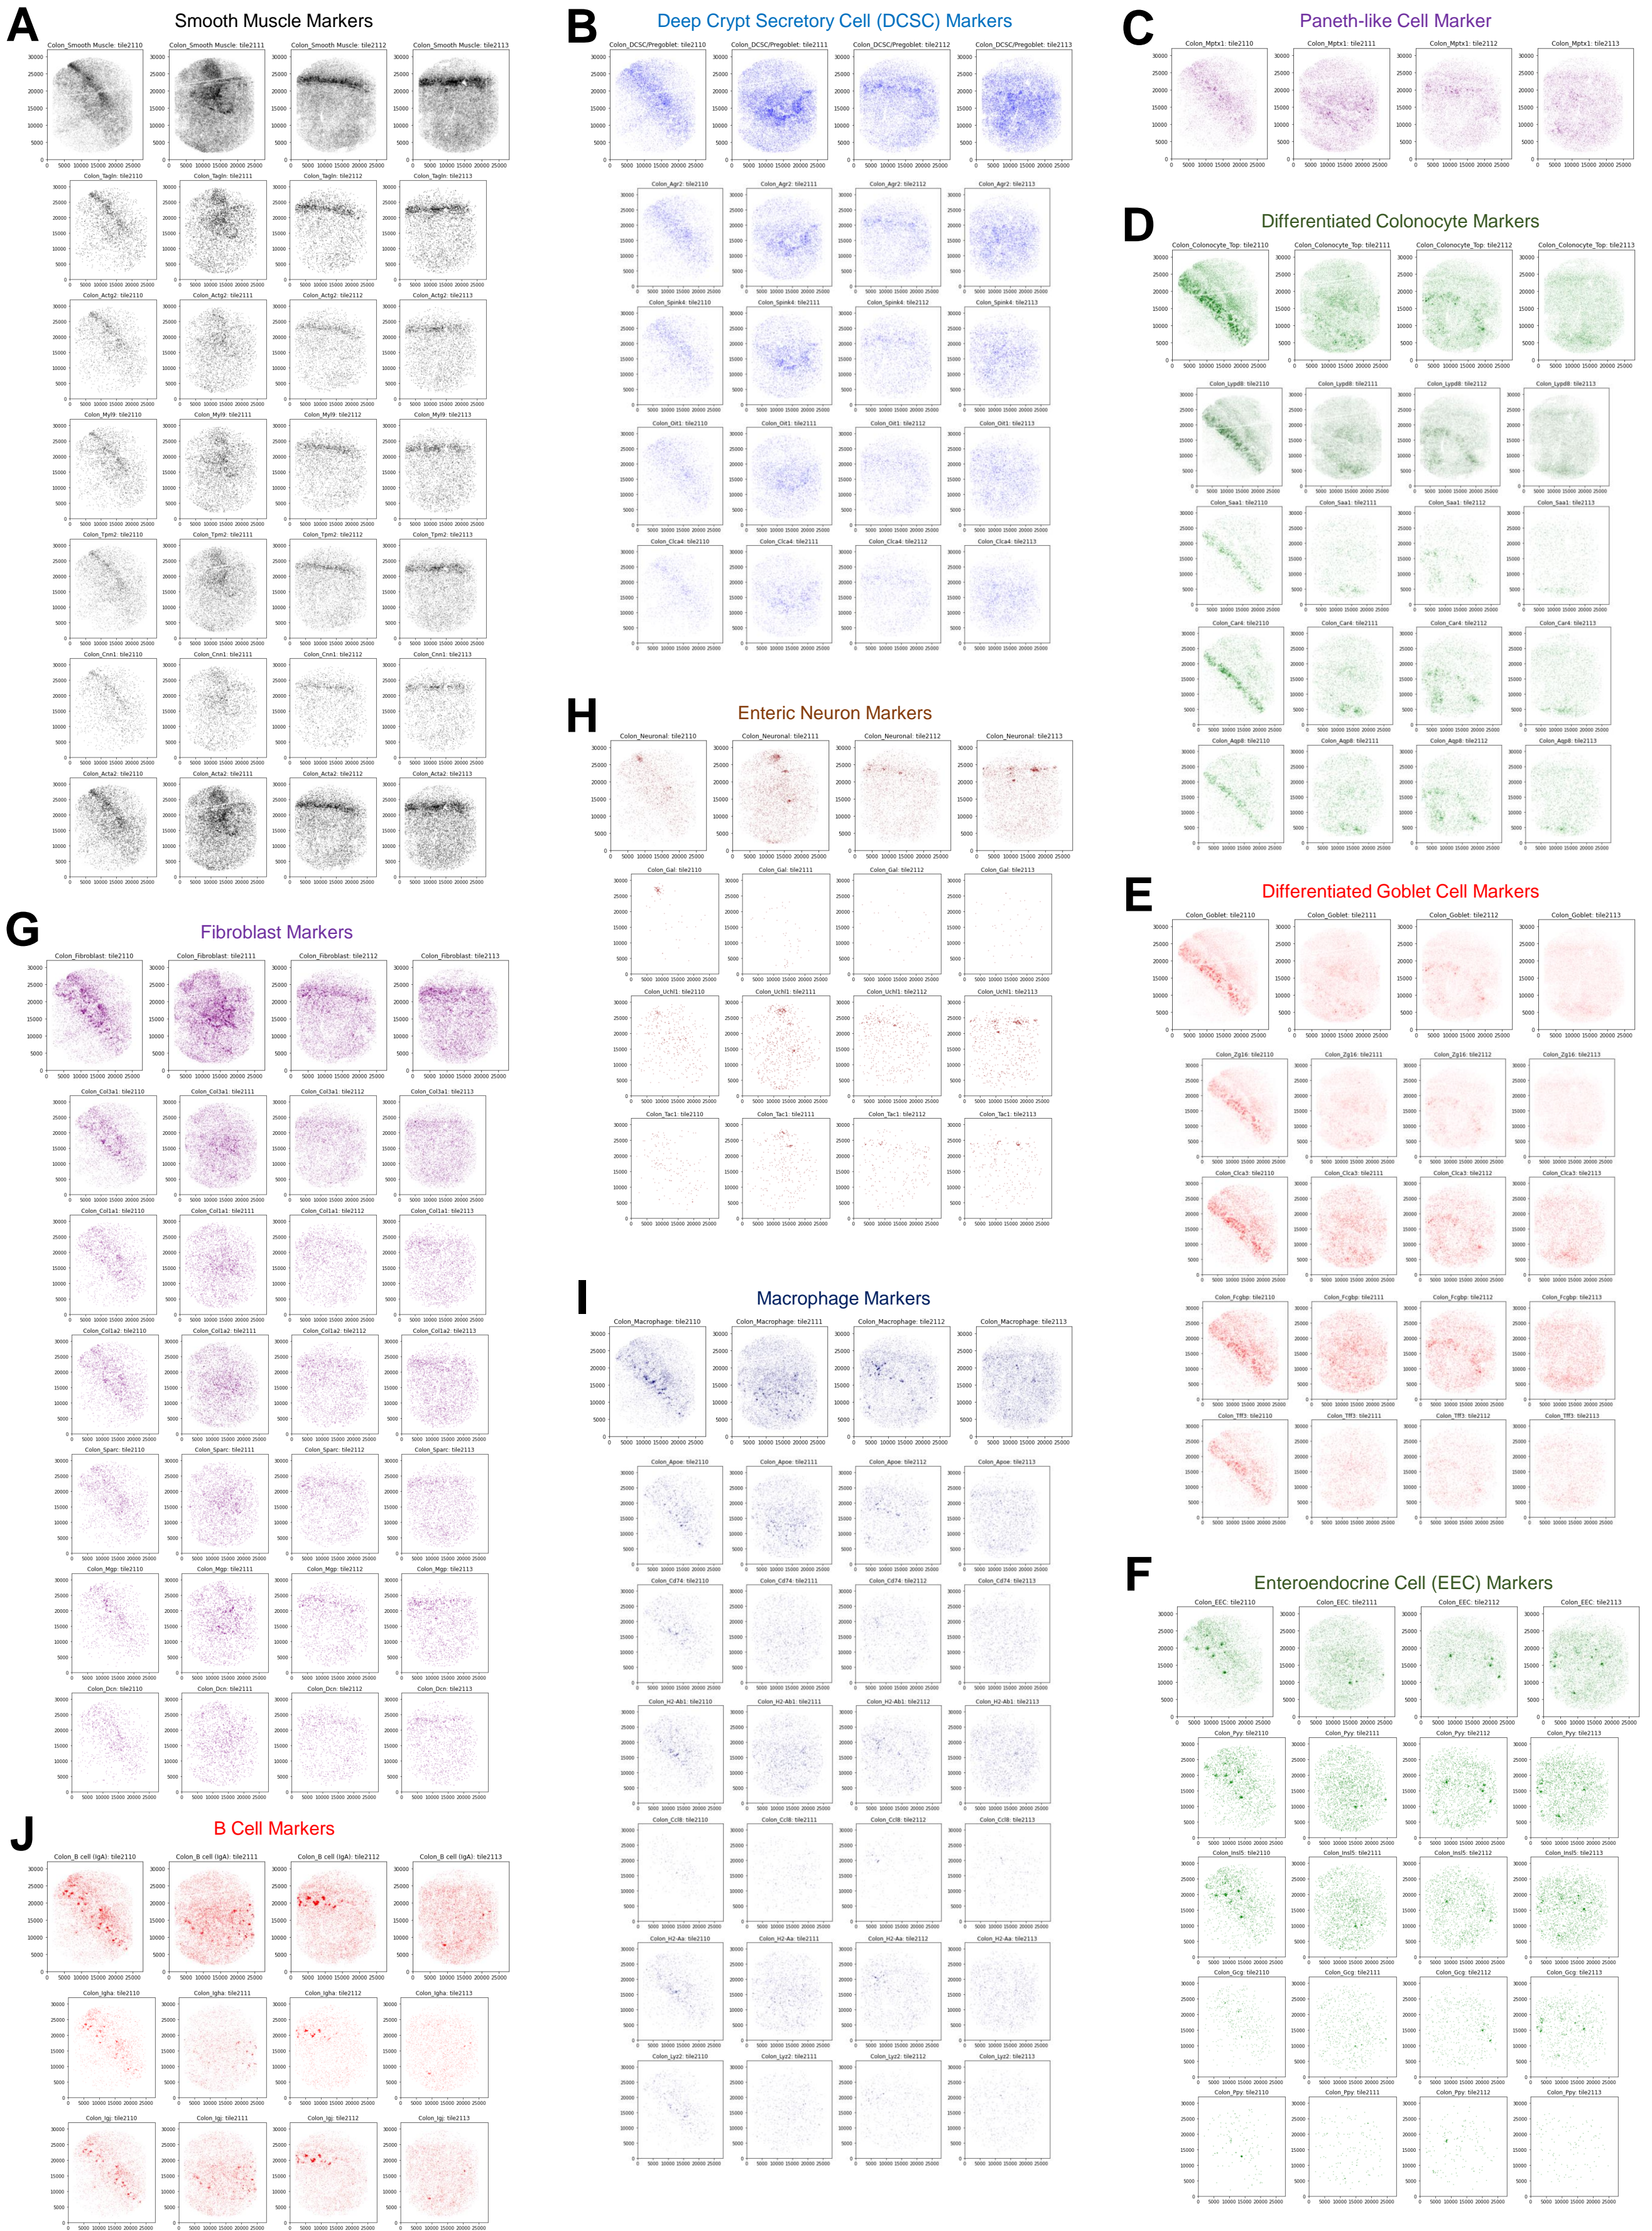

Supplement: NIHMS1704034-supplement-7.pdf [file NIHMS1704034-supplement-7.pdf]
